# Supplementary material for: Strain induced insulator-to-conductor transition in conducting polymer composites from the auxetic behaviour of hierarchical microstructures
Source: Royal Society of Chemistry journal article supplement (doi:10.1039/c7cp02742g), 2017-01-01
Supplement: c7cp02742g1.pdf [file c7cp02742g1.pdf]

## Supplementary information

### Strain induced insulator-to-semiconductor transition in conducting polymer composites originating from the auxetic behaviour of hierarchical structures

*Indu Chanchal Polpaya, C. Lakshmana Rao and Susy Varughese\**

Power law at three different regimes corresponding to above, below and at percolation are:

- a) When the volume fraction  $V_f$  of PANI in the blend just exceeds the percolation threshold

$V_{fc}$ , the conductivity of the composite can be predicted by,  $\sigma_c \propto \sigma_1 * (V_f - V_{fc})^t$ , where,  $\sigma_1$  is the conductivity of pure PANI and  $t$  is the exponent in Power law.

- b) When  $V_f < V_{fc}$ , conductivity of the composite is predicted by,  $\sigma_c \propto \sigma_2 * (V_{fc} - V_f)^{-v}$ , where,  $\sigma_2$  is the conductivity of the insulating polymer and  $v$  is the exponent in Power law.

- c) When  $|V_f - V_{fc}| \rightarrow 0$ , at the cross-over region, the conductivity of the composite is predicted by,  $\sigma_c \propto \sigma_2^u * \sigma_1^{1-u}$  where,  $u = \frac{t}{t+v}$

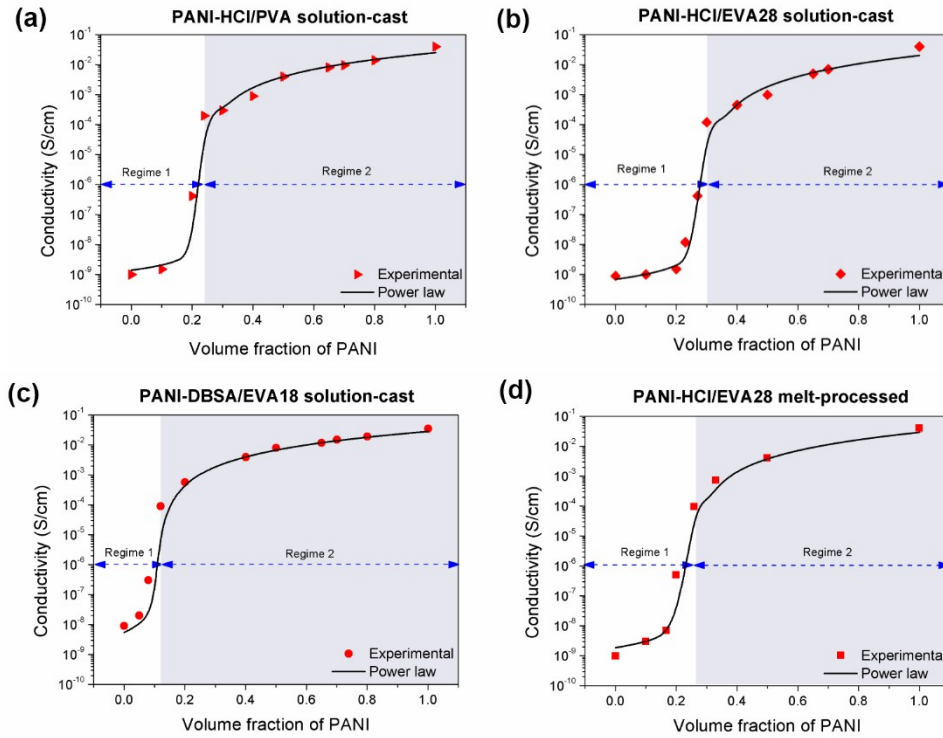

**Fig. S1.** Conductivity variation with increasing volume fraction of PANI in (a) PANI-HCl/PVA (b) PANI-HCl/EVA28 (c) PANI-DBSA/EVA18 (all solution cast) and (d) PANI-HCl/EVA28 (melt processed), by both experimental and power law fit. Regime 1 corresponds to insulator and Regime 2 to semiconductor.

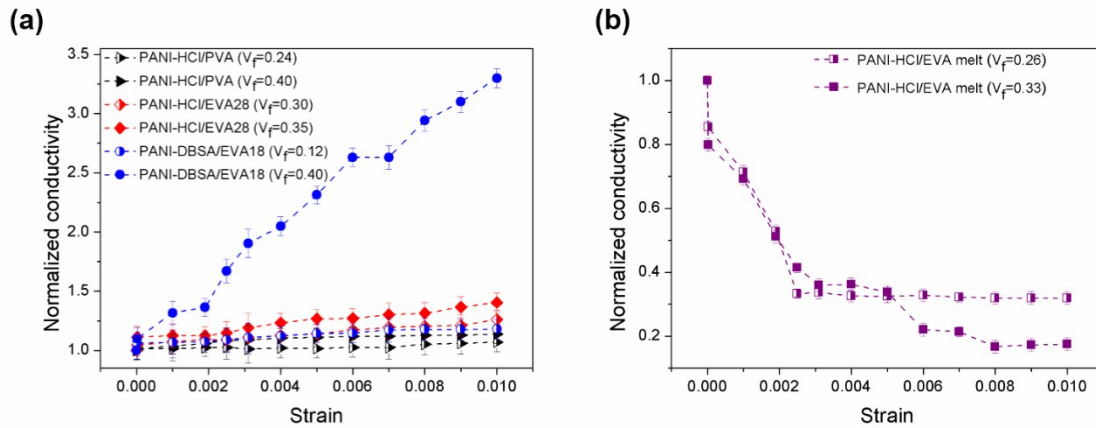

**Fig. S2.** Conductivity variation with strain at and above percolation threshold for different PANI composites (a) solution cast showing increase and (b) melt processed showing decrease in conductivity with strain. Half-filled symbols represent composites at percolation and closed symbols represent composites above percolation. The lines are to guide the eye.

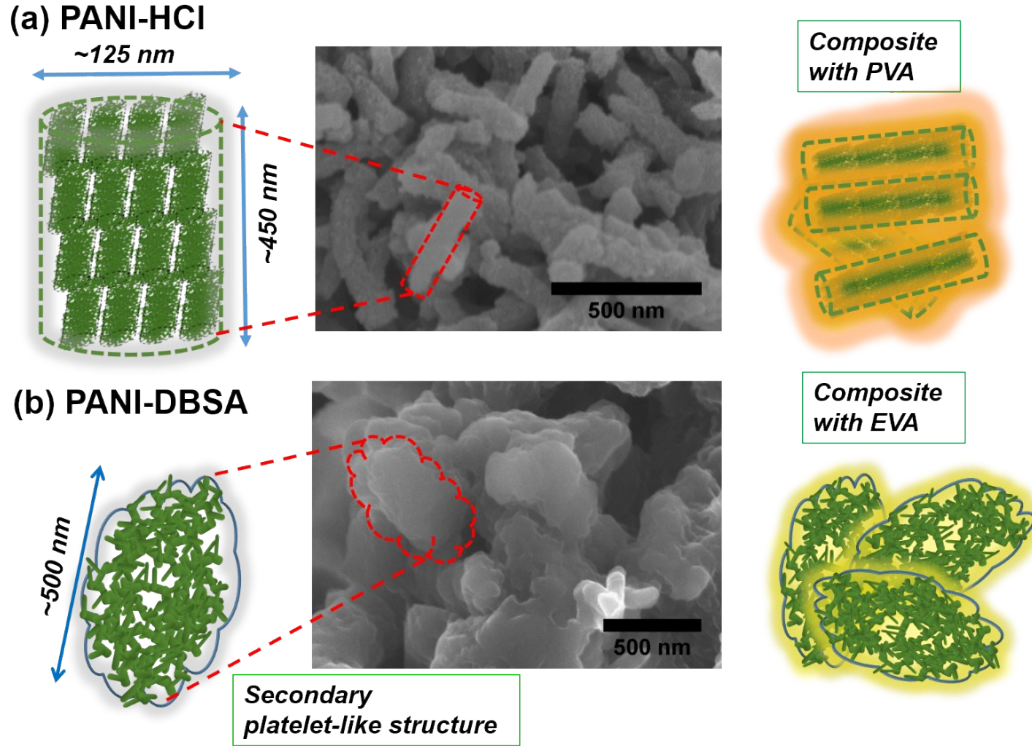

**Fig. S3.** Schematic and SEM images of (a) PANI-HCl consisting of tertiary rod-shaped agglomerates of  $\sim 450$  nm length and 125 nm dia formed from secondary agglomerates of  $\sim 100$  nm size, which are formed by the aggregation of 10 nm primary nano-rods. (b) PANI-DBSA consisting of agglomerated circular platelet-like structures of length  $\sim 500$  nm and thickness  $\sim 10$  nm formed by the aggregation of primary nano-rods.

**Table S1.** Experimentally obtained percolation threshold, power law exponents and conductivity for different PANI composites

| Composite                       | Percolation threshold | Power law exponents |       | Conductivity at $V_{fc}$ (S/cm) |
|---------------------------------|-----------------------|---------------------|-------|---------------------------------|
|                                 | $V_{fc}$              | $T$                 | $\nu$ |                                 |
| PANI-HCl/PVA                    | 0.24                  | 1.70                | 0.72  | $2.0 \times 10^{-4}$            |
| PANI-HCl/EVA28                  | 0.30                  | 1.90                | 0.95  | $1.2 \times 10^{-4}$            |
| PANI-DBSA/EVA18                 | 0.12                  | 1.70                | 0.90  | $0.90 \times 10^{-4}$           |
| PANI-HCl/EVA28 (melt processed) | 0.26                  | 1.80                | 0.98  | $0.90 \times 10^{-4}$           |

**Table S2.**Poisson's ratio of PANI composites with 1% strain

| Sample                           | Blend ratio<br>(PANI/<br>insulating<br>matrix) | Poisson's ratio<br>$\nu_{xy}$ |
|----------------------------------|------------------------------------------------|-------------------------------|
| PANI-HCl/PVA                     | 0/100                                          | 0.42-0.48                     |
|                                  | 20/80                                          | 0.32                          |
|                                  | 24/76                                          | 0.3                           |
|                                  | 40/60                                          | 0.1                           |
| PANI-HCl/EVA28                   | 0/100                                          | 0.2-0.35                      |
|                                  | 28/72                                          | 0.187                         |
|                                  | 30/70                                          | 0.18                          |
|                                  | 35/65                                          | 0.1                           |
| PANI-DBSA/EVA18                  | 0/100                                          | 0.2-0.35                      |
|                                  | 8/92                                           | 0.16                          |
|                                  | 12/88                                          | 0.15                          |
|                                  | 40/60                                          | 0.1                           |
| PANI-HCl/EVA28 melt<br>processed | 0/100                                          | 0.37                          |
|                                  | 26/74                                          | 0.15                          |
|                                  | 33/67                                          | 0.12                          |
